# Supplementary material for: Antibiotics against Pseudomonas aeruginosa on Human Skin Cell Lines: Determination of the Highest Non-Cytotoxic Concentrations with Antibiofilm Capacity for Wound Healing Strategies
Source: MDPI journal article supplement (doi:10.3390/pharmaceutics16010117), 2024-01-17
Supplement: s1 [file s1]

## **Supplementary Materials**

**Article Title:** Antibiotics against *Pseudomonas aeruginosa* on Human Skin Cell Lines: Determination of the Highest Non-Cytotoxic Concentrations with Antibiofilm Capacity for Wound Healing Strategies.

### **Authors and affiliations:**

María I. Quiñones-Vico<sup>1,2,3,4,5</sup>, Ana Fernández-González<sup>1,2,3\*</sup>, Ana Ubago-Rodríguez<sup>1,2,3</sup>, Kirsten Moll<sup>6</sup>, Anna Norrby-Teglund<sup>6</sup>, Mattias Svensson<sup>6</sup>, José Gutiérrez-Fernández<sup>7</sup>, Jesús M. Torres<sup>5</sup> and Salvador Arias-Santiago<sup>1,2,3,4,8</sup>.

<sup>1</sup>Cell Production and Tissue Engineering Unit, Virgen de las Nieves University Hospital, 18014 Granada, Spain

<sup>2</sup>Biosanitary Institute of Granada (ibs.GRANADA), 18014 Granada, Spain

<sup>3</sup>Andalusian Network of Design and Translation of Advanced Therapies, 41092 Seville, Spain

<sup>4</sup>Dermatology Department, School of Medicine, University of Granada, 18014 Granada, Spain

<sup>5</sup>Biochemistry, Molecular Biology III and Immunology Department, University of Granada, 18071, Spain.

<sup>6</sup>Center for Infectious Medicine, Karolinska Institutet, Karolinska University Hospital Huddinge, Stockholm, Sweden

<sup>7</sup>Department of Microbiology, Virgen de las Nieves University Hospital, 18014 Granada, Spain

<sup>8</sup>Dermatology Department, Virgen de las Nieves University Hospital, 18014 Granada, Spain

Correspondence: ana.fernandez.gonzalez@juntadeandalucia.es

### ***Preliminary Evaluation.***

*High Concentration of Antibiotics Cause a Reduction in Cell Proliferation in Skin Cell Lines.*

For HFs, 1.25 mg/mL AMK, 0.02 mg/mL CIP, 0.034 mg/mL COL and 1 mg/mL MER were the concentrations maintaining a cell proliferation level comparable to the control (Figure S1). For hKTs, 1.25 mg/mL AMK, 0.02 mg/mL CIP, 0.017 mg/mL COL and 1 mg/mL MER (Figure S2) were chosen for the following evaluation. It should be note that cell proliferation after AMK and COL treatments were notably reduced when compared to the control group.

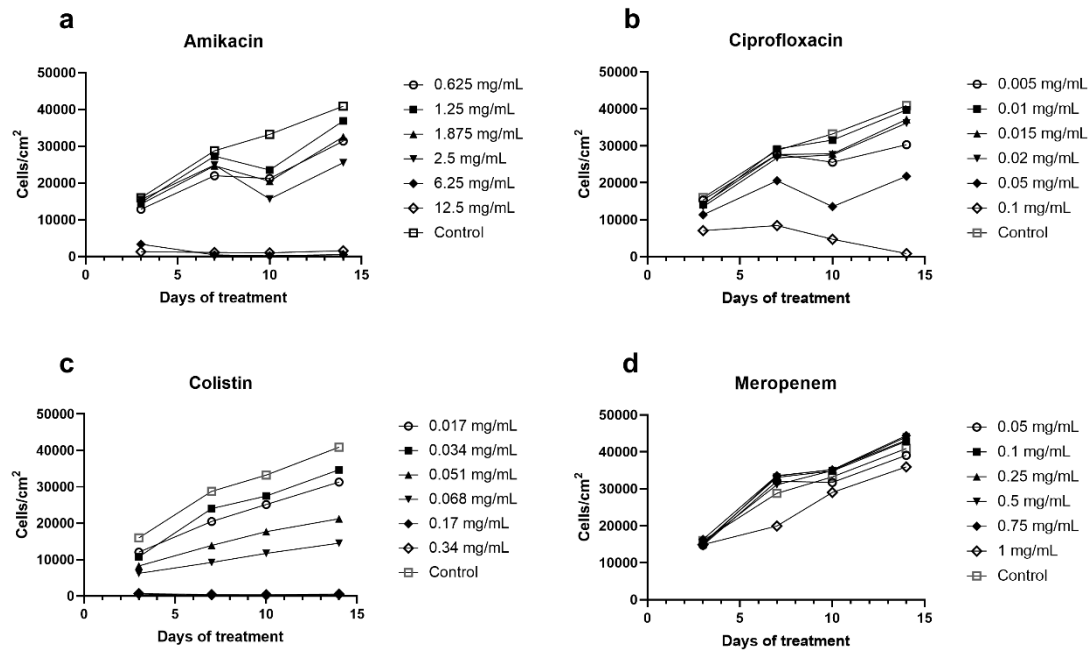

**Figure S1.** HF proliferation after (a) AMK (0.625 - 12.5 mg/mL), (b) CIP (0.005 - 0.1 mg/mL), (c) COL (0.017 - 0.34 mg/mL) and (d) MER (0.05 - 1 mg/mL) treatments in a 14-day follow-up.

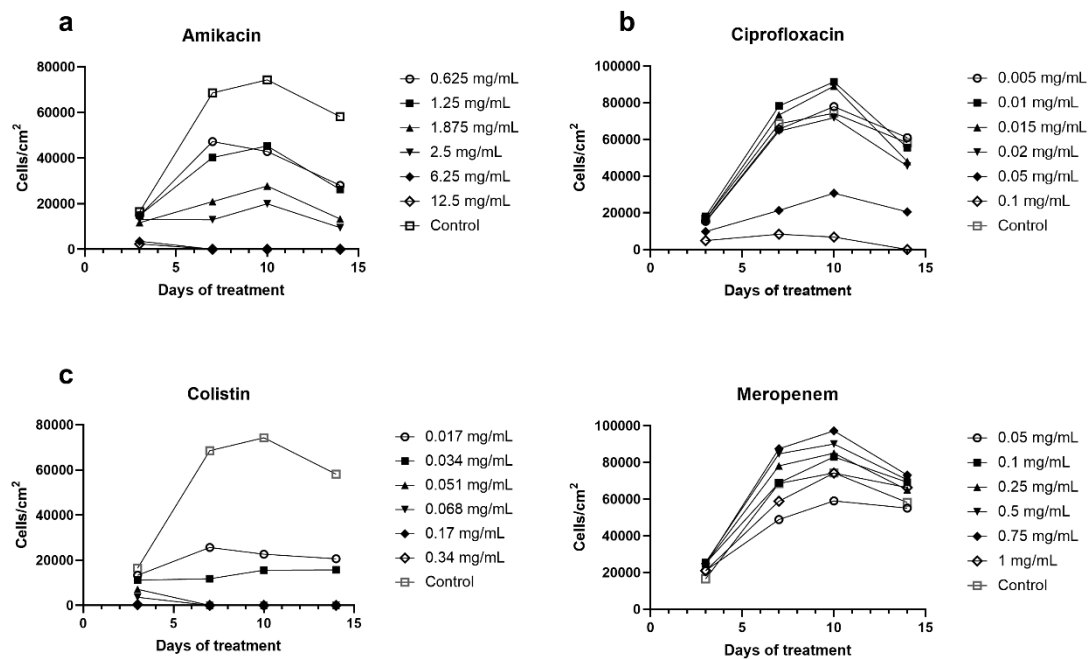

**Figure S2.** hKT proliferation after (a) AMK (0.625 - 12.5 mg/mL), (b) CIP (0.005 - 0.1 mg/mL), (c) COL (0.017 - 0.34 mg/mL) and (d) MER (0.05 - 1 mg/mL) treatments in a 14-day follow-up.

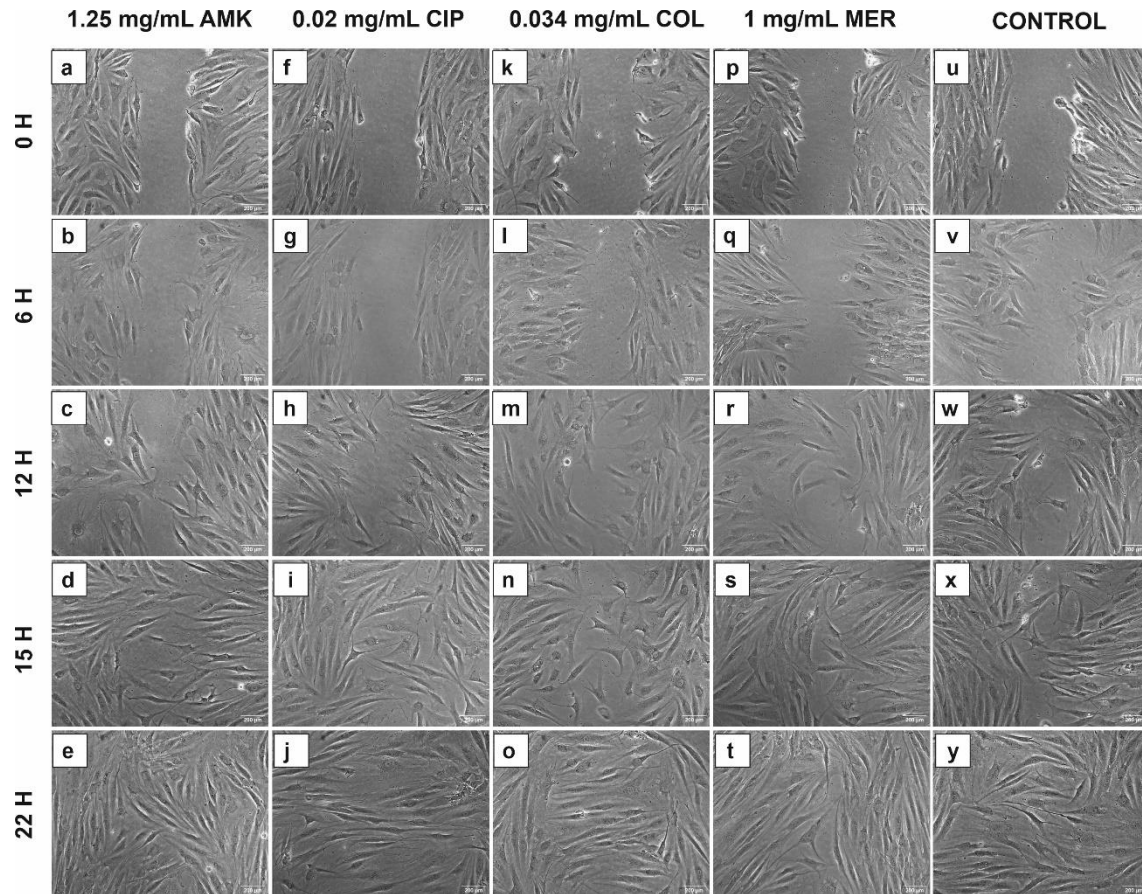

**Figure S3.** Wound closure in HFs after antibiotic treatments. I. (a-e) Wound closure assay was used on HFs after 1.25 mg/mL AMK treatment at 0,6,12, 15 and 22 h after scratching, respectively. (f-j) HFs after 0.02 mg/mL CIP treatment at 0,6,12, 15 and 22 h after scratching, respectively. (k-o) HFs after 0.034 mg/mL COL treatment at 0,6,12, 15 and 22 h after scratching, respectively. (p-t) HFs after 1 mg/mL MER treatment at 0,6,12, 15 and 22 h after scratching, respectively. (u-y) Control at 0, 6, 12, 15 and 22 h after scratching, respectively. n = 3. Magnification 10x.

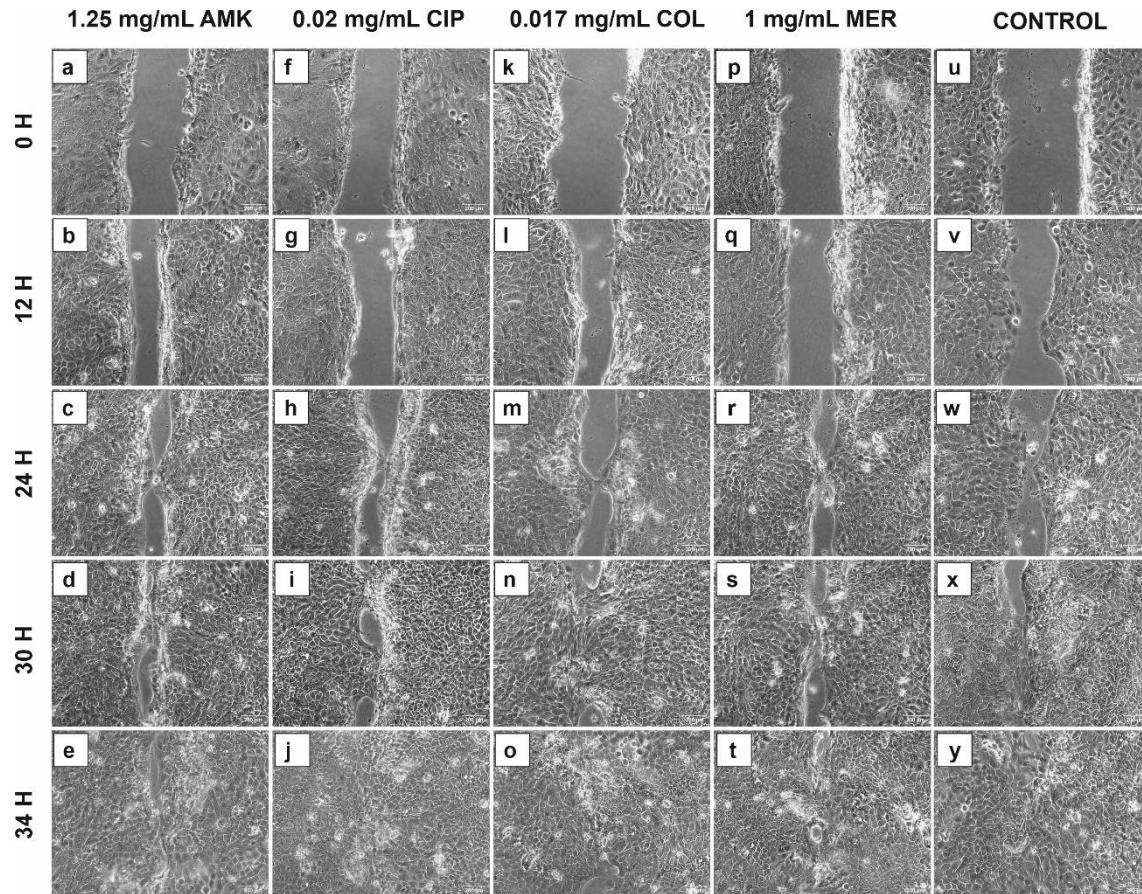

**Figure S4.** Wound closure in HF after antibiotic treatments. (a-e) Wound closure assay on hKTs after 1.25 mg/mL AMK treatment at 0, 12, 24, 30 and 34 h after scratching, respectively. (f-j) hKTs after 0.02 mg/mL CIP treatment at 0, 12, 24, 30 and 34 h after scratching, respectively. (k-o) hKTs after 0.017 mg/mL COL treatment at 0, 12, 24, 30 and 34 h after scratching, respectively. (p-t) hKTs after 1 mg/mL MER treatment at 0, 12, 24, 30 and 34 h after scratching, respectively. (u-y) Control at 0, 12, 24, 30 and 34 h after scratching, respectively. n = 3. Magnification 10x.

**Table S1.** IL-10 concentration levels in HF supernatants for each treatment and control at days 3, 7, 10 and 14; n = 3, values expressed as mean (pg/mL).

| Treatment                | D3           | D7           | D10          | D14          |
|--------------------------|--------------|--------------|--------------|--------------|
| Amikacin 1.25 mg/mL      | 12.76 ± 1.99 | 14.97 ± 0.28 | 17.70 ± 0.22 | 15.94 ± 3.86 |
| Ciprofloxacin 0.02 mg/mL | 11.31 ± 0.76 | 15.97 ± 1.56 | 17.08 ± 0.57 | 18.19 ± 0.03 |
| Colistin 0.034 mg/mL     | 11.03 ± 0.54 | 12.47 ± 0.11 | 12.28 ± 1.05 | 13.27 ± 0.45 |
| Meropenem 1 mg/mL        | 10.69 ± 0.37 | 10.34 ± 1.73 | 12.33 ± 0.36 | 13.95 ± 1.19 |
| Control                  | 14.43 ± 0.08 | 17.53 ± 0.11 | 20.34 ± 0.82 | 20.20 ± 0.79 |

**Table S2.** bFGF concentration levels in HF supernatants for each treatment and control at days 3, 7, 10 and 14; n = 3, values expressed as mean (pg/mL).

| <i>Treatment</i>                | <i>D3</i>   | <i>D7</i>      | <i>D10</i>     | <i>D14</i>     |
|---------------------------------|-------------|----------------|----------------|----------------|
| <i>Amikacin 1.25 mg/mL</i>      | 181 ± 6.67  | 224.33 ± 23.33 | 229.33 ± 21.66 | 274.33 ± 50    |
| <i>Ciprofloxacin 0.02 mg/mL</i> | 206 ± 48.33 | 294.33 ± 43.33 | 236 ± 41.67    | 294.33 ± 3.33  |
| <i>Colistin 0.034 mg/mL</i>     | 197.67 ± 30 | 204.33 ± 33.33 | 212.66 ± 28.33 | 214.33 ± 16.66 |
| <i>Meropenem 1 mg/mL</i>        | 192.67 ± 5  | 211 ± 30       | 236 ± 48.33    | 237.66 ± 13.33 |
| <i>Control</i>                  | 279.33 ± 25 | 292.66 ± 31.66 | 366 ± 38.33    | 414.33 ± 20    |

**Table S3.** TNF-α concentration levels in HF supernatants for each treatment and control at days 3, 7, 10 and 14; n = 3, values expressed as mean (pg/mL).

| <i>Treatment</i>                | <i>D3</i>      | <i>D7</i>      | <i>D10</i>     | <i>D14</i>     |
|---------------------------------|----------------|----------------|----------------|----------------|
| <i>Amikacin 1.25 mg/mL</i>      | 692.18 ± 38.75 | 760.93 ± 7.5   | 888.43 ± 70    | 643.43 ± 172.5 |
| <i>Ciprofloxacin 0.02 mg/mL</i> | 617.18 ± 13.75 | 617.18 ± 13.75 | 800.93 ± 107.5 | 697.18 ± 3.75  |
| <i>Colistin 0.034 mg/mL</i>     | 505.93 ± 7.5   | 485.93 ± 85    | 466.43 ± 23    | 558.43 ± 62.5  |
| <i>Meropenem 1 mg/mL</i>        | 484.68 ± 23.75 | 617.18 ± 46.25 | 643.43 ± 77.5  | 688.43 ± 45    |
| <i>Control</i>                  | 673.43 ± 2.5   | 697.18 ± 36.25 | 963.43 ± 97.5  | 742.18 ± 1.25  |

**Table S4.** IL-6 concentration levels in HF supernatants for each treatment and control at days 3, 7, 10 and 14; n = 3, values expressed as mean (pg/mL).

| <i>Treatment</i>                | <i>D3</i>         | <i>D7</i>        | <i>D10</i>       | <i>D14</i>        |
|---------------------------------|-------------------|------------------|------------------|-------------------|
| <i>Amikacin 1.25 mg/mL</i>      | 4348.89 ± 2233.33 | 1607.22 ± 380.55 | 1654.44 ± 133.33 | 3293.33 ± 1983.33 |
| <i>Ciprofloxacin 0.02 mg/mL</i> | 2871.11 ± 1433.33 | 1782.22 ± 455.55 | 2185 ± 102.78    | 2773.89 ± 1002.78 |
| <i>Colistin 0.034 mg/mL</i>     | 3276.67 ± 1300    | 1679.44 ± 575    | 1754.44 ± 372.25 | 2385 ± 1163.89    |
| <i>Meropenem 1 mg/mL</i>        | 2346.11 ± 902.78  | 1665.55 ± 516.65 | 1271.11 ± 77.78  | 1482.22 ± 361.11  |
| <i>Control</i>                  | 3371.11 ± 1783.33 | 1685 ± 191.67    | 1679.44 ± 202.77 | 2193.33 ± 672.25  |

**Table S5.** IL-10 concentration levels in hKTs cells supernatants for each treatment and control at days 3, 7, 10 and 14; n = 3, values expressed as mean (pg/mL).

| <i>Treatment</i>                | <i>D3</i>   | <i>D7</i>   | <i>D10</i>  | <i>D14</i>   |
|---------------------------------|-------------|-------------|-------------|--------------|
| <i>Amikacin 1.25 mg/mL</i>      | 5.18 ± 0.15 | 4.67 ± 0.03 | 4.78 ± 0.26 | 5.07 ± 0.66  |
| <i>Ciprofloxacin 0.02 mg/mL</i> | 4.78 ± 0.37 | 7.22 ± 0.54 | 8.82 ± 0.77 | 10.49 ± 0.68 |
| <i>Colistin 0.017 mg/mL</i>     | 3.10 ± 0.17 | 3.70 ± 0.03 | 3.33 ± 0.06 | 2.74 ± 0.15  |
| <i>Meropenem 1 mg/mL</i>        | 4.21 ± 1.45 | 5.07 ± 0.09 | 7.45 ± 1.39 | 7.71 ± 0.29  |
| <i>Control</i>                  | 4.49 ± 0.54 | 8.76 ± 1.96 | 9.81 ± 1.65 | 15.09 ± 1.42 |

**Table S6.** bFGF concentration levels in hKTs cells supernatants for each treatment and control at days 3, 7, 10 and 14; n = 3, values expressed as mean (pg/mL).

| <i>Treatment</i>                | <i>D3</i>      | <i>D7</i>      | <i>D10</i>    | <i>D14</i>     |
|---------------------------------|----------------|----------------|---------------|----------------|
| <i>Amikacin 1.25 mg/mL</i>      | 126 ± 8.33     | 116 ± 5        | 124.33 ± 0    | 129.33 ± 1.66  |
| <i>Ciprofloxacin 0.02 mg/mL</i> | 122.66 ± 1.66  | 134.33 ± 13.33 | 219.33 ± 5    | 251 ± 30       |
| <i>Colistin 0.017 mg/mL</i>     | 142.66 ± 21.66 | 129.33 ± 1.66  | 127.66 ± 3.33 | 122.67 ± 5     |
| <i>Meropenem 1 mg/mL</i>        | 134.33 ± 10    | 151 ± 6.67     | 207.66 ± 3.33 | 234.33 ± 23.33 |
| <i>Control</i>                  | 136 ± 8.33     | 202.67 ± 15    | 309.33 ± 15   | 556 ± 1.67     |

**Table S7.** TNF- $\alpha$  concentration levels in hKTs cells supernatants for each treatment and control at days 3, 7, 10 and 14; n = 3, values expressed as mean (pg/mL).

| <i>Treatment</i>                | <i>D3</i>      | <i>D7</i>      | <i>D10</i>     | <i>D14</i>     |
|---------------------------------|----------------|----------------|----------------|----------------|
| <i>Amikacin 1.25 mg/mL</i>      | 279.68 ± 26.25 | 293.43 ± 10    | 350.93 ± 7.5   | 299.68 ± 26.25 |
| <i>Ciprofloxacin 0.02 mg/mL</i> | 267.18 ± 6.25  | 395.93 ± 15    | 570.93 ± 62.5  | 519.68 ± 56.25 |
| <i>Colistin 0.017 mg/mL</i>     | 240.93 ± 15    | 284.68 ± 18.75 | 382.18 ± 28.75 | 268.43 ± 15    |
| <i>Meropenem 1 mg/mL</i>        | 242.18 ± 6.25  | 374.68 ± 23.75 | 454.68 ± 28.75 | 514.68 ± 36.25 |
| <i>Control</i>                  | 299.68 ± 18.75 | 507.18 ± 68.75 | 629.68 ± 8.75  | 678.43 ± 15    |

**Table S8.** IL-6 concentration levels in hKTs supernatants for each treatment and control at days 3, 7, 10 and 14; n = 3, values expressed as mean (pg/mL).

| <i>Treatment</i>                | <i>D3</i>      | <i>D7</i>        | <i>D10</i>      | <i>D14</i>      |
|---------------------------------|----------------|------------------|-----------------|-----------------|
| <i>Amikacin 1.25 mg/mL</i>      | 876.7 ± 11.1   | 862.8 ± 2.8      | 960 ± 138.9     | 823.9 ± 2.8     |
| <i>Ciprofloxacin 0.02 mg/mL</i> | 843.35 ± 22.25 | 1023.85 ± 30.55  | 1154.45 ± 33.35 | 1040.55 ± 47.25 |
| <i>Colistin 0.017 mg/mL</i>     | 829.45 ± 2.75  | 996.1 ± 13.9     | 1010 ± 22.2     | 1018.35 ± 8.35  |
| <i>Meropenem 1 mg/mL</i>        | 782.25 ± 5.55  | 1162.75 ± 108.35 | 1312.75 ± 91.65 | 757.2 ± 15.9    |
| <i>Control</i>                  | 854.4 ± 0      | 1271.1 ± 27.8    | 1110 ± 72.2     | 1032.2 ± 0      |
